# Supplementary material for: A new integrated rough multi-criteria decision-making model for enterprise resource planning software selection
Source: PeerJ Comput Sci. 2024 Jun 11;10:e2096. doi: 10.7717/peerj-cs.2096 (PMC11232603; doi:10.7717/peerj-cs.2096)
Supplement: Supplemental Information 1 [file peerj-cs-10-2096-s001.xlsx]

## Sheet: Managers
		Beneficial	Cost	Beneficial	Beneficial	Beneficial	Beneficial	Cost	Beneficial	Beneficial	Beneficial	Cost	Beneficial
Manager 1		RS	IC	SFR	EU	EIS	SR	PC	F	CMI	QSS	MSC	CS
	A1	9	5	9	8	9	9	9	8	7	9	9	8
	A2	9	5	9	8	8	8	6	8	8	9	7	9
	A3	7	6	7	8	5	7	6	6	7	7	7	8
	A4	6	6	9	9	7	8	4	7	8	8	6	7
	A5	7	7	8	7	7	7	5	7	8	8	6	7
	A6	6	7	7	7	8	7	4	6	6	7	6	8
Manager 2		RS	IC	SFR	EU	EIS	SR	PC	F	CMI	QSS	MSC	CS
	A1	9	9	9	8	9	8	9	9	9	9	9	8
	A2	6	5	8	8	8	8	7	8	7	9	7	6
	A3	5	4	4	4	5	5	5	6	5	6	6	5
	A4	6	6	7	5	7	8	4	7	7	8	6	7
	A5	6	6	8	7	7	7	5	7	7	8	5	6
	A6	5	4	4	3	4	4	4	5	5	5	6	4
Manager 3		RS	IC	SFR	EU	EIS	SR	PC	F	CMI	QSS	MSC	CS
	A1	9	7	8	2	7	9	9	8	5	8	9	5
	A2	6	3	4	8	4	5	6	4	2	5	7	8
	A3	6	4	4	6	3	5	5	5	5	5	6	8
	A4	5	3	3	7	3	5	3	3	7	4	5	7
	A5	5	3	3	7	5	5	2	3	7	4	6	7
	A6	6	8	4	5	4	6	3	5	5	5	4	4
Manager 4		RS	IC	SFR	EU	EIS	SR	PC	F	CMI	QSS	MSC	CS
	A1	8	6	7	2	7	8	9	9	5	8	8	5
	A2	5	2	4	7	4	5	6	5	2	5	7	8
	A3	5	3	3	6	3	5	5	6	5	5	6	5
	A4	4	3	3	5	3	4	4	3	7	4	6	6
	A5	4	3	3	6	5	5	3	3	7	4	6	6
	A6	5	7	4	3	4	4	3	6	5	5	4	4
Manager 5		RS	IC	SFR	EU	EIS	SR	PC	F	CMI	QSS	MSC	CS
	A1	8	8	8	8	7	8	8	8	7	8	8	8
	A2	5	4	8	7	8	8	6	8	7	9	5	6
	A3	4	3	3	4	3	5	6	5	5	5	7	5
	A4	5	5	6	5	7	8	4	7	8	8	5	6
	A5	5	6	8	6	7	5	5	7	7	8	5	6
	A6	4	4	4	3	4	4	4	5	5	5	6	4
Manager 6		RS	IC	SFR	EU	EIS	SR	PC	F	CMI	QSS	MSC	CS
	A1	8	4	8	8	9	8	8	8	7	8	8	8
	A2	8	4	8	7	8	8	6	5	7	9	5	8
	A3	6	4	7	8	5	7	5	5	7	6	6	7
	A4	5	5	7	7	7	8	3	7	7	4	6	7
	A5	6	6	8	6	5	7	5	7	7	8	5	7
	A6	5	6	7	5	8	7	3	5	5	7	4	8
Manager 7		RS	IC	SFR	EU	EIS	SR	PC	F	CMI	QSS	MSC	CS
	A1	9	4	8	2	7	8	8	8	5	8	8	5
	A2	6	2	4	8	4	5	6	4	2	5	7	6
	A3	5	3	4	4	3	7	5	6	5	6	6	6
	A4	5	5	3	5	3	5	3	5	7	4	6	6
	A5	5	6	3	6	5	5	5	3	7	4	6	6
	A6	5	6	4	5	4	4	3	5	6	5	4	4
