# Supplementary material for: A new integrated rough multi-criteria decision-making model for enterprise resource planning software selection
Source: PeerJ Comput Sci. 2024 Jun 11;10:e2096. doi: 10.7717/peerj-cs.2096 (PMC11232603; doi:10.7717/peerj-cs.2096)
Supplement: Supplemental Information 2 — Calculations of the Rough WISP method with all steps. This supports data shown in the Tables. Represents initial decision matrix, normalized decision matrix, weighted matrix and final computation. [file peerj-cs-10-2096-s002.xlsx]

## Sheet: Comparisons
			Rough WISP	Rough MARCOS	Rough TOPSIS	Rough ARAS	Rough MOORA	Rough COPRAS	Rough SAW	Rough CODAS		WISP-MARCOS	WISP-TOPSIS	WISP-ARAS	WISP-MOORA	WISP-COPRAS	WISP-SAW	WISP-CODAS
		SAP	6	6	6	6	6	6	6	6		0.942857	0.942857	0.942857	0.942857	0.942857	0.942857	0.942857
		LOGO	4	4	4	4	4	4	4	4
		IFS	5	5	5	5	5	5	5	5
		NETSIS	1	1	1	1	1	1	1	1
		MIKRO	2	3	3	3	3	3	3	3
		CANIAS	3	2	2	2	2	2	2	2
