# Supplementary material for: A new integrated rough multi-criteria decision-making model for enterprise resource planning software selection
Source: PeerJ Comput Sci. 2024 Jun 11;10:e2096. doi: 10.7717/peerj-cs.2096 (PMC11232603; doi:10.7717/peerj-cs.2096)
Supplement: Supplemental Information 3 [file peerj-cs-10-2096-s003.xlsx]

## Sheet: SA
			Beneficial		Beneficial		Beneficial		Beneficial		Beneficial		Beneficial		Beneficial		Beneficial		Beneficial		Cost		Cost		Cost
			EIS		SR		CMI		CS		EU		RS		SFR		QSS		F		IC		PC		MSC
		SAP	7.367	8.347	8.082	8.49	5.633	7.255	5.979	7.449	3.959	6.898	8.326	8.816	7.784	8.496	8.082	8.49	8.082	8.49	4.87	7.469	8.326	8.816	8.184	8.674
		LOGO	5.306	7.265	5.979	7.449	3.5	6.393	6.612	7.944	7.326	7.816	5.604	7.337	5.204	7.577	6.306	8.265	5	7.086	2.782	4.335	6.02	6.265	6.021	6.837
		IFS	3.367	4.347	5.367	6.347	5.163	5.979	5.551	7.021	4.718	6.735	4.859	6.014	3.706	5.535	5.316	6.127	5.326	5.816	3.337	4.439	5.082	5.49	6.082	6.49
		NETSIS	4.306	6.265	5.66	7.51	7.082	7.49	6.326	6.816	5.354	6.987	4.784	5.496	3.978	6.839	4.735	6.694	4.564	6.535	3.833	5.277	3.326	3.816	5.51	5.918
		MIKRO	5.367	6.347	5.367	6.347	7.02	7.265	6.184	6.674	6.184	6.674	4.859	6.014	4.633	7.082	5.306	7.265	4.306	6.265	4.469	6.053	3.704	4.85	5.326	5.816
		CANIAS	4.327	5.959	4.384	5.891	5.082	5.694	4.327	5.959	3.633	5.255	4.784	5.496	4.245	5.469	5.163	5.979	5.082	5.49	5.048	6.895	3.184	3.674	4.367	5.347
			7.367	8.347	8.082	8.49	7.082	7.49	6.612	7.944	7.326	7.816	8.326	8.816	7.784	8.496	8.082	8.49	8.082	8.49	5.048	7.469	8.326	8.816	8.184	8.674
			0.0307048	0.0366852	0.0614095	0.0745932	0.0141714	0.0158969	0.0366095	0.0489136	0.108648	0.156523	0.0803048	0.114947	0.0153524	0.0220111	0.0377905	0.0525821	0.0578667	0.091713	0.0744	0.0782617	0.357829	0.424325	0.188952	0.23234
			EIS		SR		CMI		CS		EU		RS		SFR		QSS		F		IC		PC		MSC
		SAP	0.883	1	0.952	1	0.752	0.969	0.753	0.938	0.507	0.883	0.944	1	0.916	1	0.952	1	0.952	1	0.652	1	0.944	1	0.944	1
		LOGO	0.636	0.87	0.704	0.877	0.467	0.854	0.832	1	0.937	1	0.636	0.832	0.613	0.892	0.743	0.973	0.589	0.835	0.372	0.58	0.683	0.711	0.694	0.788
		IFS	0.403	0.521	0.632	0.748	0.689	0.798	0.699	0.884	0.604	0.862	0.551	0.682	0.436	0.651	0.626	0.722	0.627	0.685	0.447	0.594	0.576	0.623	0.701	0.748
		NETSIS	0.516	0.751	0.667	0.885	0.946	1	0.796	0.858	0.685	0.894	0.543	0.623	0.468	0.805	0.558	0.788	0.538	0.77	0.513	0.707	0.377	0.433	0.635	0.682
		MIKRO	0.643	0.76	0.632	0.748	0.937	0.97	0.778	0.84	0.791	0.854	0.551	0.682	0.545	0.834	0.625	0.856	0.507	0.738	0.598	0.81	0.42	0.55	0.614	0.671
		CANIAS	0.518	0.714	0.516	0.694	0.679	0.76	0.545	0.75	0.465	0.672	0.543	0.623	0.5	0.644	0.608	0.704	0.599	0.647	0.676	0.923	0.361	0.417	0.503	0.616
				RN (K+)		RN (K-)		RN (P+)		RN (P-)		RN Yisd		RN Yitd		RN Yisr		RN Yitr		RN Yisdn		RN Yitdn		RN Yisr		RN Yitr				Yi	Rankings
			SAP	0.36	0.592	0.565	0.735	5.41947e-14	3.26142e-12	0.00292275	0.00771563	-0.375	0.027	-0.00771563	-0.00292275	0.489796	1.04779	7.02402e-12	1.11587e-09	0.520833	0.855833	0.992897	0.997693	0.555356	0.763361	1	1	0.767272	0.904222	0.8357	6
			LOGO	0.324	0.559	0.403	0.53	7.96945e-15	1.59655e-12	0.000887	0.00250724	-0.206	0.156	-0.00250724	-0.000887	0.611321	1.3871	3.17858e-12	1.79995e-09	0.661667	0.963333	0.998109	0.99973	0.600658	0.889847	1	1	0.815108	0.963228	0.8892	4
			IFS	0.263	0.459	0.372	0.485	2.00186e-15	2.11453e-13	0.000907922	0.00213574	-0.222	0.087	-0.00213574	-0.000907922	0.542268	1.23387	9.37314e-13	2.32898e-10	0.648333	0.905833	0.998481	0.999709	0.574917	0.832728	1	1	0.805433	0.934568	0.87	5
			NETSIS	0.277	0.493	0.293	0.398	3.88088e-15	6.30418e-13	0.000617778	0.00161088	-0.121	0.2	-0.00161088	-0.000617778	0.69598	1.68259	2.40917e-12	1.02046e-09	0.7325	1	0.999006	1	0.632216	1	1	1	0.840931	1	0.9205	1
			MIKRO	0.292	0.483	0.311	0.453	6.38936e-15	5.77596e-13	0.000775745	0.00230644	-0.161	0.172	-0.00230644	-0.000775745	0.644592	1.55305	2.77023e-12	7.44569e-10	0.699167	0.976667	0.99831	0.999842	0.61306	0.951711	1	1	0.827634	0.982055	0.9048	2
			CANIAS	0.237	0.414	0.275	0.392	1.30316e-15	1.40952e-13	0.000617479	0.00182932	-0.155	0.139	-0.00182932	-0.000617479	0.604592	1.50545	7.12371e-13	2.28271e-10	0.704167	0.949167	0.998787	1	0.598149	0.933967	1	1	0.825276	0.970783	0.898	3
												-0.121	0.2	-0.00161088	-0.000617479	0.69598	1.68259	7.02402e-12	1.79995e-09

## Sheet: DA1
		W1	W2	W3	W4	W5	W6	W7	W8	W9	W10	W11	W12
		0.068	0.063	0.013	0.092	0.026	0.052	0.303	0.049	0.012	0.032	0.16	0.031
			C7														C4														C11
		0.95	0.28785													0.95	0.0874													0.95	0.152
		0.85	0.25755													0.85	0.0782													0.85	0.136
		0.75	0.22725													0.75	0.069													0.75	0.12
		0.65	0.19695													0.65	0.0598													0.65	0.104
		0.55	0.16665													0.55	0.0506													0.55	0.088
		0.45	0.13635													0.45	0.0414													0.45	0.072
		0.35	0.10605													0.35	0.0322													0.35	0.056
		0.25	0.07575													0.25	0.023													0.25	0.04
		0.15	0.04545													0.15	0.0138													0.15	0.024
		0.05	0.01515													0.05	0.0046													0.05	0.008
			C1	C2	C3	C4	C5	C6	C7	C8	C9	C10	C11	C12			C1	C2	C3	C4	C5	C6	C7	C8	C9	C10	C11	C12			C1	C2	C3	C4	C5	C6	C7	C8	C9	C10	C11	C12
		S1	0.069478	0.0643694	0.0132826	0.0939997	0.0265651	0.0531303	0.28785	0.0500651	0.0122608	0.0326956	0.163478	0.0316738		S11	0.0683445	0.0633192	0.0130659	0.0874	0.0261317	0.0522634	0.304535	0.0492482	0.0120608	0.0321621	0.160811	0.031157		S1	0.0686476	0.0636	0.0131238	0.0928762	0.0262476	0.0524952	0.305886	0.0494667	0.0121143	0.0323048	0.161524	0.0312952
		S2	0.0724341	0.0671081	0.0138477	0.0979991	0.0276954	0.0553908	0.25755	0.0521952	0.0127825	0.0340867	0.170433	0.0330214		S12	0.0690335	0.0639575	0.0131976	0.0782	0.0263952	0.0527903	0.307605	0.0497447	0.0121824	0.0324863	0.162432	0.0314711		S2	0.0699429	0.0648	0.0133714	0.0946286	0.0267429	0.0534857	0.311657	0.0504	0.0123429	0.0329143	0.164571	0.0318857
		S3	0.0753902	0.0698468	0.0144128	0.101999	0.0288257	0.0576514	0.22725	0.0543253	0.0133042	0.0354778	0.177389	0.0343691		S13	0.0697225	0.0645958	0.0133293	0.069	0.0266586	0.0533172	0.310675	0.0502412	0.012304	0.0328106	0.164053	0.0317852		S3	0.0712381	0.066	0.013619	0.096381	0.0272381	0.0544762	0.317429	0.0513333	0.0125714	0.0335238	0.167619	0.0324762
		S4	0.0783463	0.0725856	0.014978	0.105998	0.029956	0.0599119	0.19695	0.0564555	0.0138258	0.0368689	0.184344	0.0357167		S14	0.0704115	0.0652341	0.013461	0.0598	0.026922	0.0538441	0.313745	0.0507377	0.0124256	0.0331348	0.165674	0.0320993		S4	0.0725333	0.0672	0.0138667	0.0981333	0.0277333	0.0554667	0.3232	0.0522667	0.0128	0.0341333	0.170667	0.0330667
		S5	0.0813024	0.0753243	0.0155431	0.109997	0.0310862	0.0621725	0.16665	0.0585856	0.0143475	0.03826	0.1913	0.0370643		S15	0.0711004	0.0658725	0.0135927	0.0506	0.0271855	0.0543709	0.316815	0.0512341	0.0125471	0.033459	0.167295	0.0324134		S5	0.0738286	0.0684	0.0141143	0.0998857	0.0282286	0.0564571	0.328971	0.0532	0.0130286	0.0347429	0.173714	0.0336571
		S6	0.0842585	0.0780631	0.0161082	0.113997	0.0322165	0.064433	0.13635	0.0607157	0.0148692	0.0396511	0.198255	0.038412		S16	0.0717894	0.0665108	0.0137244	0.0414	0.0274489	0.0548978	0.319885	0.0517306	0.0126687	0.0337833	0.168916	0.0327275		S6	0.0751238	0.0696	0.0143619	0.101638	0.0287238	0.0574476	0.334743	0.0541333	0.0132571	0.0353524	0.176762	0.0342476
		S7	0.0872146	0.0808018	0.0166734	0.117996	0.0333468	0.0666935	0.10605	0.0628458	0.0153908	0.0410422	0.205211	0.0397596		S17	0.0724784	0.0671491	0.0138562	0.0322	0.0277123	0.0554247	0.322955	0.0522271	0.0127903	0.0341075	0.170537	0.0330416		S7	0.076419	0.0708	0.0146095	0.10339	0.029219	0.0584381	0.340514	0.0550667	0.0134857	0.0359619	0.17981	0.0348381
		S8	0.0901707	0.0835405	0.0172385	0.121996	0.034477	0.0689541	0.07575	0.064976	0.0159125	0.0424333	0.212166	0.0411072		S18	0.0731674	0.0677874	0.0139879	0.023	0.0279758	0.0559515	0.326025	0.0527236	0.0129119	0.0344317	0.172159	0.0333557		S8	0.0777143	0.072	0.0148571	0.105143	0.0297143	0.0594286	0.346286	0.056	0.0137143	0.0365714	0.182857	0.0354286
		S9	0.0931268	0.0862793	0.0178037	0.125995	0.0356073	0.0712146	0.04545	0.0671061	0.0164341	0.0438244	0.219122	0.0424549		S19	0.0738564	0.0684258	0.0141196	0.0138	0.0282392	0.0564784	0.329095	0.05322	0.0130335	0.0347559	0.17378	0.0336698		S9	0.0790095	0.0732	0.0151048	0.106895	0.0302095	0.060419	0.352057	0.0569333	0.0139429	0.037181	0.185905	0.036019
		S10	0.0960829	0.089018	0.0183688	0.129995	0.0367376	0.0734752	0.01515	0.0692362	0.0169558	0.0452155	0.226077	0.0438025		S20	0.0745454	0.0690641	0.0142513	0.0046	0.0285026	0.0570053	0.332165	0.0537165	0.0131551	0.0350802	0.175401	0.0339839		S10	0.0803048	0.0744	0.0153524	0.108648	0.0307048	0.0614095	0.357829	0.0578667	0.0141714	0.0377905	0.188952	0.0366095
																S21	0.0686476	0.0636	0.0131238	0.0928762	0.0262476	0.0524952	0.305886	0.0494667	0.0121143	0.0323048	0.161524	0.0312952
																S22	0.0699429	0.0648	0.0133714	0.0946286	0.0267429	0.0534857	0.311657	0.0504	0.0123429	0.0329143	0.164571	0.0318857
																S23	0.0712381	0.066	0.013619	0.096381	0.0272381	0.0544762	0.317429	0.0513333	0.0125714	0.0335238	0.167619	0.0324762
																S24	0.0725333	0.0672	0.0138667	0.0981333	0.0277333	0.0554667	0.3232	0.0522667	0.0128	0.0341333	0.170667	0.0330667
																S25	0.0738286	0.0684	0.0141143	0.0998857	0.0282286	0.0564571	0.328971	0.0532	0.0130286	0.0347429	0.173714	0.0336571
																S26	0.0751238	0.0696	0.0143619	0.101638	0.0287238	0.0574476	0.334743	0.0541333	0.0132571	0.0353524	0.176762	0.0342476
																S27	0.076419	0.0708	0.0146095	0.10339	0.029219	0.0584381	0.340514	0.0550667	0.0134857	0.0359619	0.17981	0.0348381
																S28	0.0777143	0.072	0.0148571	0.105143	0.0297143	0.0594286	0.346286	0.056	0.0137143	0.0365714	0.182857	0.0354286
																S29	0.0790095	0.0732	0.0151048	0.106895	0.0302095	0.060419	0.352057	0.0569333	0.0139429	0.037181	0.185905	0.036019
																S30	0.0803048	0.0744	0.0153524	0.108648	0.0307048	0.0614095	0.357829	0.0578667	0.0141714	0.0377905	0.188952	0.0366095

## Sheet: DA2
		W1	W2	W3	W4	W5	W6	W7	W8	W9	W10	W11	W12
		0.094	0.064	0.018	0.128	0.03	0.061	0.347	0.075	0.013	0.043	0.19	0.04
			C7														C4														C11
		0.95	0.32965													0.95	0.1216													0.95	0.1805
		0.85	0.29495													0.85	0.1088													0.85	0.1615
		0.75	0.26025													0.75	0.096													0.75	0.1425
		0.65	0.22555													0.65	0.0832													0.65	0.1235
		0.55	0.19085													0.55	0.0704													0.55	0.1045
		0.45	0.15615													0.45	0.0576													0.45	0.0855
		0.35	0.12145													0.35	0.0448													0.35	0.0665
		0.25	0.08675													0.25	0.032													0.25	0.0475
		0.15	0.05205													0.15	0.0192													0.15	0.0285
		0.05	0.01735													0.05	0.0064													0.05	0.0095
			C1	C2	C3	C4	C5	C6	C7	C8	C9	C10	C11	C12			C1	C2	C3	C4	C5	C6	C7	C8	C9	C10	C11	C12			C1	C2	C3	C4	C5	C6	C7	C8	C9	C10	C11	C12
		S1	0.0964975	0.0657005	0.0184783	0.131401	0.0307971	0.0626208	0.32965	0.0769927	0.0133454	0.0441425	0.195048	0.0410628		S11	0.0946899	0.0644697	0.0181321	0.1216	0.0302202	0.0614477	0.349547	0.0755505	0.0130954	0.0433156	0.191394	0.0402936		S1	0.0951025	0.0647506	0.0182111	0.129501	0.0303519	0.0617154	0.35107	0.0758796	0.0131525	0.0435043	0.192228	0.0404691
		S2	0.101493	0.0691014	0.0194348	0.138203	0.0323913	0.0658623	0.29495	0.0809782	0.0140362	0.0464275	0.205145	0.0431884		S12	0.0960697	0.0654092	0.0183963	0.1088	0.0306606	0.0623431	0.35464	0.0766514	0.0132862	0.0439468	0.194183	0.0408807		S2	0.0973074	0.0662519	0.0186333	0.132504	0.0310556	0.0631463	0.359209	0.0776389	0.0134574	0.044513	0.196685	0.0414074
		S3	0.106488	0.0725023	0.0203913	0.145005	0.0339855	0.0691038	0.26025	0.0849636	0.014727	0.0487125	0.215241	0.0453139		S13	0.0974495	0.0663486	0.0186606	0.096	0.0311009	0.0632385	0.359734	0.0777523	0.0134771	0.044578	0.196972	0.0414679		S3	0.0995123	0.0677531	0.0190556	0.135506	0.0317593	0.0645772	0.367349	0.0793981	0.0137623	0.0455216	0.201142	0.0423457
		S4	0.111483	0.0759032	0.0213478	0.151806	0.0355796	0.0723453	0.22555	0.0889491	0.0154178	0.0509975	0.225338	0.0474395		S14	0.0988294	0.0672881	0.0189248	0.0832	0.0315413	0.0641339	0.364828	0.0788532	0.0136679	0.0452092	0.199761	0.042055		S4	0.101717	0.0692543	0.0194778	0.138509	0.032463	0.066008	0.375488	0.0811574	0.0140673	0.0465302	0.205599	0.043284
		S5	0.116478	0.0793041	0.0223043	0.158608	0.0371738	0.0755868	0.19085	0.0929345	0.0161087	0.0532825	0.235434	0.0495651		S15	0.100209	0.0682275	0.019189	0.0704	0.0319817	0.0650294	0.369921	0.0799541	0.0138587	0.0458404	0.20255	0.0426422		S5	0.103922	0.0707556	0.0199	0.141511	0.0331667	0.0674389	0.383628	0.0829167	0.0143722	0.0475389	0.210056	0.0442222
		S6	0.121473	0.0827051	0.0232608	0.16541	0.038768	0.0788283	0.15615	0.09692	0.0167995	0.0555675	0.245531	0.0516907		S16	0.101589	0.069167	0.0194532	0.0576	0.032422	0.0659248	0.375015	0.081055	0.0140495	0.0464716	0.205339	0.0432294		S6	0.106127	0.0722568	0.0203222	0.144514	0.0338704	0.0688698	0.391767	0.0846759	0.0146772	0.0485475	0.214512	0.0451605
		S7	0.126468	0.086106	0.0242173	0.172212	0.0403622	0.0820698	0.12145	0.100905	0.0174903	0.0578525	0.255627	0.0538162		S17	0.102969	0.0701064	0.0197174	0.0448	0.0328624	0.0668202	0.380108	0.082156	0.0142404	0.0471028	0.208128	0.0438165		S7	0.108332	0.073758	0.0207444	0.147516	0.0345741	0.0703006	0.399907	0.0864352	0.0149821	0.0495562	0.218969	0.0460988
		S8	0.131463	0.0895069	0.0251738	0.179014	0.0419564	0.0853113	0.08675	0.104891	0.0181811	0.0601374	0.265724	0.0559418		S18	0.104349	0.0710459	0.0199817	0.032	0.0333028	0.0677156	0.385202	0.0832569	0.0144312	0.0477339	0.210917	0.0444037		S8	0.110537	0.0752593	0.0211667	0.150519	0.0352778	0.0717315	0.408046	0.0881944	0.015287	0.0505648	0.223426	0.047037
		S9	0.136458	0.0929078	0.0261303	0.185816	0.0435505	0.0885528	0.05205	0.108876	0.0188719	0.0624224	0.27582	0.0580674		S19	0.105728	0.0719853	0.0202459	0.0192	0.0337431	0.068611	0.390295	0.0843578	0.014622	0.0483651	0.213706	0.0449908		S9	0.112742	0.0767605	0.0215889	0.153521	0.0359815	0.0731623	0.416186	0.0899537	0.015592	0.0515735	0.227883	0.0479753
		S10	0.141453	0.0963087	0.0270868	0.192617	0.0451447	0.0917943	0.01735	0.112862	0.0195627	0.0647074	0.285917	0.060193		S20	0.107108	0.0729248	0.0205101	0.0064	0.0341835	0.0695064	0.395389	0.0854587	0.0148128	0.0489963	0.216495	0.045578		S10	0.114947	0.0782617	0.0220111	0.156523	0.0366852	0.0745932	0.424325	0.091713	0.0158969	0.0525821	0.23234	0.0489136
																S21	0.0951025	0.0647506	0.0182111	0.129501	0.0303519	0.0617154	0.35107	0.0758796	0.0131525	0.0435043	0.192228	0.0404691
																S22	0.0973074	0.0662519	0.0186333	0.132504	0.0310556	0.0631463	0.359209	0.0776389	0.0134574	0.044513	0.196685	0.0414074
																S23	0.0995123	0.0677531	0.0190556	0.135506	0.0317593	0.0645772	0.367349	0.0793981	0.0137623	0.0455216	0.201142	0.0423457
																S24	0.101717	0.0692543	0.0194778	0.138509	0.032463	0.066008	0.375488	0.0811574	0.0140673	0.0465302	0.205599	0.043284
																S25	0.103922	0.0707556	0.0199	0.141511	0.0331667	0.0674389	0.383628	0.0829167	0.0143722	0.0475389	0.210056	0.0442222
																S26	0.106127	0.0722568	0.0203222	0.144514	0.0338704	0.0688698	0.391767	0.0846759	0.0146772	0.0485475	0.214512	0.0451605
																S27	0.108332	0.073758	0.0207444	0.147516	0.0345741	0.0703006	0.399907	0.0864352	0.0149821	0.0495562	0.218969	0.0460988
																S28	0.110537	0.0752593	0.0211667	0.150519	0.0352778	0.0717315	0.408046	0.0881944	0.015287	0.0505648	0.223426	0.047037
																S29	0.112742	0.0767605	0.0215889	0.153521	0.0359815	0.0731623	0.416186	0.0899537	0.015592	0.0515735	0.227883	0.0479753
																S30	0.114947	0.0782617	0.0220111	0.156523	0.0366852	0.0745932	0.424325	0.091713	0.0158969	0.0525821	0.23234	0.0489136

## Sheet: DA3
				C1		C2		C3		C4		C5		C6		C7		C8		C9		C10		C11		C12			C1	C2	C3	C4	C5	C6	C7	C8	C9	C10	C11	C12
			S1	0.069478	0.0964975	0.0643694	0.0657005	0.0132826	0.0184783	0.0939997	0.131401	0.0265651	0.0307971	0.0531303	0.0626208	0.28785	0.32965	0.0500651	0.0769927	0.0122608	0.0133454	0.0326956	0.0441425	0.163478	0.195048	0.0316738	0.0410628	S1	0.0964975	0.0657005	0.0184783	0.131401	0.0307971	0.0626208	0.32965	0.0769927	0.0133454	0.0441425	0.195048	0.0410628
			S2	0.0724341	0.101493	0.0671081	0.0691014	0.0138477	0.0194348	0.0979991	0.138203	0.0276954	0.0323913	0.0553908	0.0658623	0.25755	0.29495	0.0521952	0.0809782	0.0127825	0.0140362	0.0340867	0.0464275	0.170433	0.205145	0.0330214	0.0431884	S2	0.101493	0.0691014	0.0194348	0.138203	0.0323913	0.0658623	0.29495	0.0809782	0.0140362	0.0464275	0.205145	0.0431884
			S3	0.0753902	0.106488	0.0698468	0.0725023	0.0144128	0.0203913	0.101999	0.145005	0.0288257	0.0339855	0.0576514	0.0691038	0.22725	0.26025	0.0543253	0.0849636	0.0133042	0.014727	0.0354778	0.0487125	0.177389	0.215241	0.0343691	0.0453139	S3	0.106488	0.0725023	0.0203913	0.145005	0.0339855	0.0691038	0.26025	0.0849636	0.014727	0.0487125	0.215241	0.0453139
			S4	0.0783463	0.111483	0.0725856	0.0759032	0.014978	0.0213478	0.105998	0.151806	0.029956	0.0355796	0.0599119	0.0723453	0.19695	0.22555	0.0564555	0.0889491	0.0138258	0.0154178	0.0368689	0.0509975	0.184344	0.225338	0.0357167	0.0474395	S4	0.111483	0.0759032	0.0213478	0.151806	0.0355796	0.0723453	0.22555	0.0889491	0.0154178	0.0509975	0.225338	0.0474395
			S5	0.0813024	0.116478	0.0753243	0.0793041	0.0155431	0.0223043	0.109997	0.158608	0.0310862	0.0371738	0.0621725	0.0755868	0.16665	0.19085	0.0585856	0.0929345	0.0143475	0.0161087	0.03826	0.0532825	0.1913	0.235434	0.0370643	0.0495651	S5	0.116478	0.0793041	0.0223043	0.158608	0.0371738	0.0755868	0.19085	0.0929345	0.0161087	0.0532825	0.235434	0.0495651
			S6	0.0842585	0.121473	0.0780631	0.0827051	0.0161082	0.0232608	0.113997	0.16541	0.0322165	0.038768	0.064433	0.0788283	0.13635	0.15615	0.0607157	0.09692	0.0148692	0.0167995	0.0396511	0.0555675	0.198255	0.245531	0.038412	0.0516907	S6	0.121473	0.0827051	0.0232608	0.16541	0.038768	0.0788283	0.15615	0.09692	0.0167995	0.0555675	0.245531	0.0516907
			S7	0.0872146	0.126468	0.0808018	0.086106	0.0166734	0.0242173	0.117996	0.172212	0.0333468	0.0403622	0.0666935	0.0820698	0.10605	0.12145	0.0628458	0.100905	0.0153908	0.0174903	0.0410422	0.0578525	0.205211	0.255627	0.0397596	0.0538162	S7	0.126468	0.086106	0.0242173	0.172212	0.0403622	0.0820698	0.12145	0.100905	0.0174903	0.0578525	0.255627	0.0538162
			S8	0.0901707	0.131463	0.0835405	0.0895069	0.0172385	0.0251738	0.121996	0.179014	0.034477	0.0419564	0.0689541	0.0853113	0.07575	0.08675	0.064976	0.104891	0.0159125	0.0181811	0.0424333	0.0601374	0.212166	0.265724	0.0411072	0.0559418	S8	0.131463	0.0895069	0.0251738	0.179014	0.0419564	0.0853113	0.08675	0.104891	0.0181811	0.0601374	0.265724	0.0559418
			S9	0.0931268	0.136458	0.0862793	0.0929078	0.0178037	0.0261303	0.125995	0.185816	0.0356073	0.0435505	0.0712146	0.0885528	0.04545	0.05205	0.0671061	0.108876	0.0164341	0.0188719	0.0438244	0.0624224	0.219122	0.27582	0.0424549	0.0580674	S9	0.136458	0.0929078	0.0261303	0.185816	0.0435505	0.0885528	0.05205	0.108876	0.0188719	0.0624224	0.27582	0.0580674
			S10	0.0960829	0.141453	0.089018	0.0963087	0.0183688	0.0270868	0.129995	0.192617	0.0367376	0.0451447	0.0734752	0.0917943	0.01515	0.01735	0.0692362	0.112862	0.0169558	0.0195627	0.0452155	0.0647074	0.226077	0.285917	0.0438025	0.060193	S10	0.141453	0.0963087	0.0270868	0.192617	0.0451447	0.0917943	0.01735	0.112862	0.0195627	0.0647074	0.285917	0.060193
			S11	0.0683445	0.0946899	0.0633192	0.0644697	0.0130659	0.0181321	0.0874	0.1216	0.0261317	0.0302202	0.0522634	0.0614477	0.304535	0.349547	0.0492482	0.0755505	0.0120608	0.0130954	0.0321621	0.0433156	0.160811	0.191394	0.031157	0.0402936	S11	0.0946899	0.0644697	0.0181321	0.1216	0.0302202	0.0614477	0.349547	0.0755505	0.0130954	0.0433156	0.191394	0.0402936
			S12	0.0690335	0.0960697	0.0639575	0.0654092	0.0131976	0.0183963	0.0782	0.1088	0.0263952	0.0306606	0.0527903	0.0623431	0.307605	0.35464	0.0497447	0.0766514	0.0121824	0.0132862	0.0324863	0.0439468	0.162432	0.194183	0.0314711	0.0408807	S12	0.0960697	0.0654092	0.0183963	0.1088	0.0306606	0.0623431	0.35464	0.0766514	0.0132862	0.0439468	0.194183	0.0408807
			S13	0.0697225	0.0974495	0.0645958	0.0663486	0.0133293	0.0186606	0.069	0.096	0.0266586	0.0311009	0.0533172	0.0632385	0.310675	0.359734	0.0502412	0.0777523	0.012304	0.0134771	0.0328106	0.044578	0.164053	0.196972	0.0317852	0.0414679	S13	0.0974495	0.0663486	0.0186606	0.096	0.0311009	0.0632385	0.359734	0.0777523	0.0134771	0.044578	0.196972	0.0414679
			S14	0.0704115	0.0988294	0.0652341	0.0672881	0.013461	0.0189248	0.0598	0.0832	0.026922	0.0315413	0.0538441	0.0641339	0.313745	0.364828	0.0507377	0.0788532	0.0124256	0.0136679	0.0331348	0.0452092	0.165674	0.199761	0.0320993	0.042055	S14	0.0988294	0.0672881	0.0189248	0.0832	0.0315413	0.0641339	0.364828	0.0788532	0.0136679	0.0452092	0.199761	0.042055
			S15	0.0711004	0.100209	0.0658725	0.0682275	0.0135927	0.019189	0.0506	0.0704	0.0271855	0.0319817	0.0543709	0.0650294	0.316815	0.369921	0.0512341	0.0799541	0.0125471	0.0138587	0.033459	0.0458404	0.167295	0.20255	0.0324134	0.0426422	S15	0.100209	0.0682275	0.019189	0.0704	0.0319817	0.0650294	0.369921	0.0799541	0.0138587	0.0458404	0.20255	0.0426422
			S16	0.0717894	0.101589	0.0665108	0.069167	0.0137244	0.0194532	0.0414	0.0576	0.0274489	0.032422	0.0548978	0.0659248	0.319885	0.375015	0.0517306	0.081055	0.0126687	0.0140495	0.0337833	0.0464716	0.168916	0.205339	0.0327275	0.0432294	S16	0.101589	0.069167	0.0194532	0.0576	0.032422	0.0659248	0.375015	0.081055	0.0140495	0.0464716	0.205339	0.0432294
			S17	0.0724784	0.102969	0.0671491	0.0701064	0.0138562	0.0197174	0.0322	0.0448	0.0277123	0.0328624	0.0554247	0.0668202	0.322955	0.380108	0.0522271	0.082156	0.0127903	0.0142404	0.0341075	0.0471028	0.170537	0.208128	0.0330416	0.0438165	S17	0.102969	0.0701064	0.0197174	0.0448	0.0328624	0.0668202	0.380108	0.082156	0.0142404	0.0471028	0.208128	0.0438165
			S18	0.0731674	0.104349	0.0677874	0.0710459	0.0139879	0.0199817	0.023	0.032	0.0279758	0.0333028	0.0559515	0.0677156	0.326025	0.385202	0.0527236	0.0832569	0.0129119	0.0144312	0.0344317	0.0477339	0.172159	0.210917	0.0333557	0.0444037	S18	0.104349	0.0710459	0.0199817	0.032	0.0333028	0.0677156	0.385202	0.0832569	0.0144312	0.0477339	0.210917	0.0444037
			S19	0.0738564	0.105728	0.0684258	0.0719853	0.0141196	0.0202459	0.0138	0.0192	0.0282392	0.0337431	0.0564784	0.068611	0.329095	0.390295	0.05322	0.0843578	0.0130335	0.014622	0.0347559	0.0483651	0.17378	0.213706	0.0336698	0.0449908	S19	0.105728	0.0719853	0.0202459	0.0192	0.0337431	0.068611	0.390295	0.0843578	0.014622	0.0483651	0.213706	0.0449908
			S20	0.0745454	0.107108	0.0690641	0.0729248	0.0142513	0.0205101	0.0046	0.0064	0.0285026	0.0341835	0.0570053	0.0695064	0.332165	0.395389	0.0537165	0.0854587	0.0131551	0.0148128	0.0350802	0.0489963	0.175401	0.216495	0.0339839	0.045578	S20	0.107108	0.0729248	0.0205101	0.0064	0.0341835	0.0695064	0.395389	0.0854587	0.0148128	0.0489963	0.216495	0.045578
			S21	0.0686476	0.0951025	0.0636	0.0647506	0.0131238	0.0182111	0.0928762	0.129501	0.0262476	0.0303519	0.0524952	0.0617154	0.305886	0.35107	0.0494667	0.0758796	0.0121143	0.0131525	0.0323048	0.0435043	0.161524	0.192228	0.0312952	0.0404691	S21	0.0951025	0.0647506	0.0182111	0.129501	0.0303519	0.0617154	0.35107	0.0758796	0.0131525	0.0435043	0.192228	0.0404691
			S22	0.0699429	0.0973074	0.0648	0.0662519	0.0133714	0.0186333	0.0946286	0.132504	0.0267429	0.0310556	0.0534857	0.0631463	0.311657	0.359209	0.0504	0.0776389	0.0123429	0.0134574	0.0329143	0.044513	0.164571	0.196685	0.0318857	0.0414074	S22	0.0973074	0.0662519	0.0186333	0.132504	0.0310556	0.0631463	0.359209	0.0776389	0.0134574	0.044513	0.196685	0.0414074
			S23	0.0712381	0.0995123	0.066	0.0677531	0.013619	0.0190556	0.096381	0.135506	0.0272381	0.0317593	0.0544762	0.0645772	0.317429	0.367349	0.0513333	0.0793981	0.0125714	0.0137623	0.0335238	0.0455216	0.167619	0.201142	0.0324762	0.0423457	S23	0.0995123	0.0677531	0.0190556	0.135506	0.0317593	0.0645772	0.367349	0.0793981	0.0137623	0.0455216	0.201142	0.0423457
			S24	0.0725333	0.101717	0.0672	0.0692543	0.0138667	0.0194778	0.0981333	0.138509	0.0277333	0.032463	0.0554667	0.066008	0.3232	0.375488	0.0522667	0.0811574	0.0128	0.0140673	0.0341333	0.0465302	0.170667	0.205599	0.0330667	0.043284	S24	0.101717	0.0692543	0.0194778	0.138509	0.032463	0.066008	0.375488	0.0811574	0.0140673	0.0465302	0.205599	0.043284
			S25	0.0738286	0.103922	0.0684	0.0707556	0.0141143	0.0199	0.0998857	0.141511	0.0282286	0.0331667	0.0564571	0.0674389	0.328971	0.383628	0.0532	0.0829167	0.0130286	0.0143722	0.0347429	0.0475389	0.173714	0.210056	0.0336571	0.0442222	S25	0.103922	0.0707556	0.0199	0.141511	0.0331667	0.0674389	0.383628	0.0829167	0.0143722	0.0475389	0.210056	0.0442222
			S26	0.0751238	0.106127	0.0696	0.0722568	0.0143619	0.0203222	0.101638	0.144514	0.0287238	0.0338704	0.0574476	0.0688698	0.334743	0.391767	0.0541333	0.0846759	0.0132571	0.0146772	0.0353524	0.0485475	0.176762	0.214512	0.0342476	0.0451605	S26	0.106127	0.0722568	0.0203222	0.144514	0.0338704	0.0688698	0.391767	0.0846759	0.0146772	0.0485475	0.214512	0.0451605
			S27	0.076419	0.108332	0.0708	0.073758	0.0146095	0.0207444	0.10339	0.147516	0.029219	0.0345741	0.0584381	0.0703006	0.340514	0.399907	0.0550667	0.0864352	0.0134857	0.0149821	0.0359619	0.0495562	0.17981	0.218969	0.0348381	0.0460988	S27	0.108332	0.073758	0.0207444	0.147516	0.0345741	0.0703006	0.399907	0.0864352	0.0149821	0.0495562	0.218969	0.0460988
			S28	0.0777143	0.110537	0.072	0.0752593	0.0148571	0.0211667	0.105143	0.150519	0.0297143	0.0352778	0.0594286	0.0717315	0.346286	0.408046	0.056	0.0881944	0.0137143	0.015287	0.0365714	0.0505648	0.182857	0.223426	0.0354286	0.047037	S28	0.110537	0.0752593	0.0211667	0.150519	0.0352778	0.0717315	0.408046	0.0881944	0.015287	0.0505648	0.223426	0.047037
			S29	0.0790095	0.112742	0.0732	0.0767605	0.0151048	0.0215889	0.106895	0.153521	0.0302095	0.0359815	0.060419	0.0731623	0.352057	0.416186	0.0569333	0.0899537	0.0139429	0.015592	0.037181	0.0515735	0.185905	0.227883	0.036019	0.0479753	S29	0.112742	0.0767605	0.0215889	0.153521	0.0359815	0.0731623	0.416186	0.0899537	0.015592	0.0515735	0.227883	0.0479753
			S30	0.0803048	0.114947	0.0744	0.0782617	0.0153524	0.0220111	0.108648	0.156523	0.0307048	0.0366852	0.0614095	0.0745932	0.357829	0.424325	0.0578667	0.091713	0.0141714	0.0158969	0.0377905	0.0525821	0.188952	0.23234	0.0366095	0.0489136	S30	0.114947	0.0782617	0.0220111	0.156523	0.0366852	0.0745932	0.424325	0.091713	0.0158969	0.0525821	0.23234	0.0489136
				S1	S2	S3	S4	S5	S6	S7	S8	S9	S10	S11	S12	S13	S14	S15	S16	S17	S18	S19	S20	S21	S22	S23	S24	S25	S26	S27	S28	S29	S30
			SFT1	6	6	6	6	6	6	6	6	6	4	6	6	6	6	6	6	6	6	6	6	6	6	6	6	6	6	6	6	6	6
			SFT2	4	4	3	3	2	2	1	1	1	1	4	4	4	4	4	4	4	4	4	4	4	4	4	4	4	4	4	4	4	4
			SFT3	5	5	5	5	5	5	5	5	5	5	5	5	5	5	5	5	5	5	5	5	5	5	5	5	5	5	5	5	5	5
			SFT4	1	1	1	1	1	1	2	2	2	2	1	1	1	1	1	1	1	1	1	1	1	1	1	1	1	1	1	1	1	1
			SFT5	2	2	2	2	3	3	3	3	3	3	2	2	2	2	2	2	3	3	3	3	2	2	2	2	2	2	2	2	2	2
			SFT6	3	3	4	4	4	4	4	4	4	6	3	3	3	3	3	2	2	2	2	2	3	3	3	3	3	3	3	3	3	3

## Sheet: Sheet1
	Rough WISP	Rough	Rough ARAS	Rough	Rough TOPSIS	Rough MOORA	Rough CODAS	Rough
		MARCOS		COPRAS				SAW
SFT-1	6	6	6	6	6	6	6	6
SFT-2	4	4	4	4	4	4	4	4
SFT-3	5	5	5	5	5	5	5	5
SFT-4	1	1	1	1	1	1	1	1
SFT-5	2	3	3	3	2	3	3	2
SFT-6	3	2	2	2	3	2	2	3
	Rough WISP	Rough MARCOS	Rough ARAS	Rough COPRAS	Rough TOPSIS	Rough MOORA	Rough CODAS	Rough SAW
SFT-1	6	6	6	6	6	6	6	6
SFT-2	4	4	4	4	4	4	4	4
SFT-3	5	5	5	5	5	5	5	5
SFT-4	1	1	1	1	1	1	1	1
SFT-5	2	3	3	3	2	3	3	2
SFT-6	3	2	2	2	3	2	2	3

## Sheet: SCC and WS ranks CA
			Rough WISP	Rough MARCOS	Rough ARAS	Rough COPRAS	Rough TOPSIS	Rough MOORA	Rough CODAS	Rough SAW						SCC	Rough WISP	Rough MARCOS	Rough ARAS	Rough COPRAS	Rough TOPSIS	Rough MOORA	Rough CODAS	Rough SAW	AV
		SFT-1	6	6	6	6	6	6	6	6						Rough WISP	1	0.942857	0.942857	0.942857	1	0.942857	0.942857	1	0.964286
		SFT-2	4	4	4	4	4	4	4	4						Rough MARCOS	0.942857	1	1	1	0.942857	1	1	0.942857	0.978571
		SFT-3	5	5	5	5	5	5	5	5						Rough ARAS	0.942857	1	1	1	0.942857	1	1	0.942857	0.978571
		SFT-4	1	1	1	1	1	1	1	1						Rough COPRAS	0.942857	1	1	1	0.942857	1	1	0.942857	0.978571
		SFT-5	2	3	3	3	2	3	3	2						Rough TOPSIS	1	0.942857	0.942857	0.942857	1	0.942857	0.942857	1	0.964286
		SFT-6	3	2	2	2	3	2	2	3						Rough MOORA	0.942857	1	1	1	0.942857	1	1	0.942857	0.978571
																Rough CODAS	0.942857	1	1	1	0.942857	1	1	0.942857	0.978571
		SKK	0.942857	1	1	1	0.942857	1	1	0.942857						Rough SAW	1	0.942857	0.942857	0.942857	1	0.942857	0.942857	1	0.964286
																									0.973214
			0.0571429	0	0	0	0.0571429	0	0	0.0571429
			210	210	210	210	210	210	210	210
6		A1	0	0	0	0	0	0	0	0
4		A2	0	0	0	0	0	0	0	0
5		A3	0	0	0	0	0	0	0	0
1		A4	0	0	0	0	0	0	0	0						WS	Rough WISP	Rough MARCOS	Rough ARAS	Rough COPRAS	Rough TOPSIS	Rough MOORA	Rough CODAS	Rough SAW	AV
3		A5	1	0	0	0	1	0	0	1						Rough WISP	1	0.895833	0.895833	0.895833	1	0.895833	0.895833	1	0.934896
2		A6	1	0	0	0	1	0	0	1						Rough MARCOS	0.895833	1	1	1	0.895833	1	1	0.895833	0.960938
																Rough ARAS	0.895833	1	1	1	0.895833	1	1	0.895833	0.960938
			Rough WISP	Rough MARCOS	Rough ARAS	Rough COPRAS	Rough TOPSIS	Rough MOORA	Rough CODAS	Rough SAW						Rough COPRAS	0.895833	1	1	1	0.895833	1	1	0.895833	0.960938
		SFT-1	6	6	6	6	6	6	6	6						Rough TOPSIS	1	0.895833	0.895833	0.895833	1	0.895833	0.895833	1	0.934896
		SFT-2	4	4	4	4	4	4	4	4						Rough MOORA	0.895833	1	1	1	0.895833	1	1	0.895833	0.960938
		SFT-3	5	5	5	5	5	5	5	5						Rough CODAS	0.895833	1	1	1	0.895833	1	1	0.895833	0.960938
		SFT-4	1	1	1	1	1	1	1	1						Rough SAW	1	0.895833	0.895833	0.895833	1	0.895833	0.895833	1	0.934896
		SFT-5	2	3	3	3	2	3	3	2															0.951172
		SFT-6	3	2	2	2	3	2	2	3
		WS	0.895833	1	1	1	0.895833	1	1	0.895833
			0.104167	0	0	0	0.104167	0	0	0.104167
			6	6	6	6	6	6	6	6
6	0.015625	A1	0	0	0	0	0	0	0	0
4	0.0625	A2	0	0	0	0	0	0	0	0
5	0.03125	A3	0	0	0	0	0	0	0	0
1	0.5	A4	0	0	0	0	0	0	0	0
3	0.125	A5	0.333333	0	0	0	0.333333	0	0	0.333333
2	0.25	A6	0.25	0	0	0	0.25	0	0	0.25
			0

## Sheet: SCC and WS ranks SA
			S1	S2	S3	S4	S5	S6	S7	S8	S9	S10	S11	S12	S13	S14	S15	S16	S17	S18	S19	S20	S21	S22	S23	S24	S25	S26	S27	S28	S29	S30
		SFT1	6	6	6	6	6	6	6	6	6	4	6	6	6	6	6	6	6	6	6	6	6	6	6	6	6	6	6	6	6	6
		SFT2	4	4	3	3	2	2	1	1	1	1	4	4	4	4	4	4	4	4	4	4	4	4	4	4	4	4	4	4	4	4
		SFT3	5	5	5	5	5	5	5	5	5	5	5	5	5	5	5	5	5	5	5	5	5	5	5	5	5	5	5	5	5	5
		SFT4	1	1	1	1	1	1	2	2	2	2	1	1	1	1	1	1	1	1	1	1	1	1	1	1	1	1	1	1	1	1
		SFT5	2	2	2	2	3	3	3	3	3	3	2	2	2	2	2	2	3	3	3	3	2	2	2	2	2	2	2	2	2	2
		SFT6	3	3	4	4	4	4	4	4	4	6	3	3	3	3	3	2	2	2	2	2	3	3	3	3	3	3	3	3	3	3
		SKK	1	1	0.942857	0.942857	0.828571	0.828571	0.657143	0.657143	0.657143	0.314286	1	1	1	1	1	0.971429	0.942857	0.942857	0.942857	0.942857	1	1	1	1	1	1	1	1	1	1
			0	0	0.0571429	0.0571429	0.171429	0.171429	0.342857	0.342857	0.342857	0.685714	0	0	0	0	0	0.0285714	0.0571429	0.0571429	0.0571429	0.0571429	0	0	0	0	0	0	0	0	0	0				SET 1	SET 2	SET 3	SET 4	SET 5	SET 6	SET 7	SET 8	SET 9	SET 10	SET 11	SET 12	SET 13	SET 14
			210	210	210	210	210	210	210	210	210	210	210	210	210	210	210	210	210	210	210	210	210	210	210	210	210	210	210	210	210	210			SCC	1	1	0.942857	0.942857	0.828571	0.828571	0.657143	0.657143	0.657143	0.314286	1	1	1	1
6		A1	0	0	0	0	0	0	0	0	0	4	0	0	0	0	0	0	0	0	0	0	0	0	0	0	0	0	0	0	0	0			WS	1	1	0.9375	0.9375	0.854167	0.854167	0.733333	0.733333	0.733333	0.64375	1	1	1	1
4		A2	0	0	1	1	4	4	9	9	9	9	0	0	0	0	0	0	0	0	0	0	0	0	0	0	0	0	0	0	0	0
5		A3	0	0	0	0	0	0	0	0	0	0	0	0	0	0	0	0	0	0	0	0	0	0	0	0	0	0	0	0	0	0
1		A4	0	0	0	0	0	0	1	1	1	1	0	0	0	0	0	0	0	0	0	0	0	0	0	0	0	0	0	0	0	0
2		A5	0	0	0	0	1	1	1	1	1	1	0	0	0	0	0	0	1	1	1	1	0	0	0	0	0	0	0	0	0	0
3		A6	0	0	1	1	1	1	1	1	1	9	0	0	0	0	0	1	1	1	1	1	0	0	0	0	0	0	0	0	0	0
			S1	S2	S3	S4	S5	S6	S7	S8	S9	S10	S11	S12	S13	S14	S15	S16	S17	S18	S19	S20	S21	S22	S23	S24	S25	S26	S27	S28	S29	S30
		SFT-1	6	6	6	6	6	6	6	6	6	4	6	6	6	6	6	6	6	6	6	6	6	6	6	6	6	6	6	6	6	6
		SFT-2	4	4	3	3	2	2	1	1	1	1	4	4	4	4	4	4	4	4	4	4	4	4	4	4	4	4	4	4	4	4
		SFT-3	5	5	5	5	5	5	5	5	5	5	5	5	5	5	5	5	5	5	5	5	5	5	5	5	5	5	5	5	5	5
		SFT-4	1	1	1	1	1	1	2	2	2	2	1	1	1	1	1	1	1	1	1	1	1	1	1	1	1	1	1	1	1	1
		SFT-5	2	2	2	2	3	3	3	3	3	3	2	2	2	2	2	2	3	3	3	3	2	2	2	2	2	2	2	2	2	2
		SFT-6	3	3	4	4	4	4	4	4	4	6	3	3	3	3	3	2	2	2	2	2	3	3	3	3	3	3	3	3	3	3
		WS	1	1	0.9375	0.9375	0.854167	0.854167	0.733333	0.733333	0.733333	0.64375	1	1	1	1	1	0.958333	0.895833	0.895833	0.895833	0.895833	1	1	1	1	1	1	1	1	1	1
			0	0	0.0625	0.0625	0.145833	0.145833	0.266667	0.266667	0.266667	0.35625	0	0	0	0	0	0.0416667	0.104167	0.104167	0.104167	0.104167	0	0	0	0	0	0	0	0	0	0
			6	6	6	6	6	6	6	6	6	6	6	6	6	6	6	6	6	6	6	6	6	6	6	6	6	6	6	6	6	6
6	0.015625	A1	0	0	0	0	0	0	0	0	0	0.4	0	0	0	0	0	0	0	0	0	0	0	0	0	0	0	0	0	0	0	0
4	0.0625	A2	0	0	0.333333	0.333333	0.666667	0.666667	1	1	1	1	0	0	0	0	0	0	0	0	0	0	0	0	0	0	0	0	0	0	0	0
5	0.03125	A3	0	0	0	0	0	0	0	0	0	0	0	0	0	0	0	0	0	0	0	0	0	0	0	0	0	0	0	0	0	0
1	0.5	A4	0	0	0	0	0	0	0.2	0.2	0.2	0.2	0	0	0	0	0	0	0	0	0	0	0	0	0	0	0	0	0	0	0	0
2	0.25	A5	0	0	0	0	0.25	0.25	0.25	0.25	0.25	0.25	0	0	0	0	0	0	0.25	0.25	0.25	0.25	0	0	0	0	0	0	0	0	0	0
3	0.125	A6	0	0	0.333333	0.333333	0.333333	0.333333	0.333333	0.333333	0.333333	1	0	0	0	0	0	0.333333	0.333333	0.333333	0.333333	0.333333	0	0	0	0	0	0	0	0	0	0
			0
[truncated: 18 more columns]
